# Supplementary material for: Dietary non-fermentable fiber prevents autoimmune neurological disease by changing gut metabolic and immune status
Source: PubMed Central journal article supplement (PMC6041322; doi:10.1038/s41598-018-28839-3), 2018-07-11
Supplement: 41598_2018_28839_MOESM1_ESM.pdf [file 41598_2018_28839_MOESM1_ESM.pdf]

## Supplementary information

### **Dietary non-fermentable fiber prevents autoimmune neurological disease by changing gut metabolic and immune status**

Kerstin Berer<sup>1</sup>, Inés Martínez<sup>2</sup>, Alesia Walker<sup>3</sup>, Birgit Kunkel<sup>1,7</sup>, Philippe Schmitt-Kopplin<sup>3,4,5</sup>, Jens Walter<sup>2,6</sup> and Gurumoorthy Krishnamoorthy<sup>7\*</sup>

<sup>1</sup>Hertie Senior Professor Group, Max Planck Institute of Neurobiology, Martinsried, Germany

<sup>2</sup>Department of Agricultural, Food & Nutritional Science, University of Alberta, Edmonton, Canada

<sup>3</sup>Research Unit Analytical BioGeoChemistry, Helmholtz Zentrum München, Neuherberg, Germany

<sup>4</sup>Chair of Analytical Food Chemistry, Technische Universität München, Freising-Weihenstephan, Germany

<sup>5</sup>ZIEL – Institute for Food & Health, Technische Universität München, Germany

<sup>6</sup>Department of Biological Sciences, University of Alberta, Edmonton, Canada

<sup>7</sup>Research group Neuroinflammation and mucosal Immunology, Max Planck Institute of Biochemistry, Martinsried, Germany

\*Corresponding author. E-mail: [guru@biochem.mpg.de](mailto:guru@biochem.mpg.de)

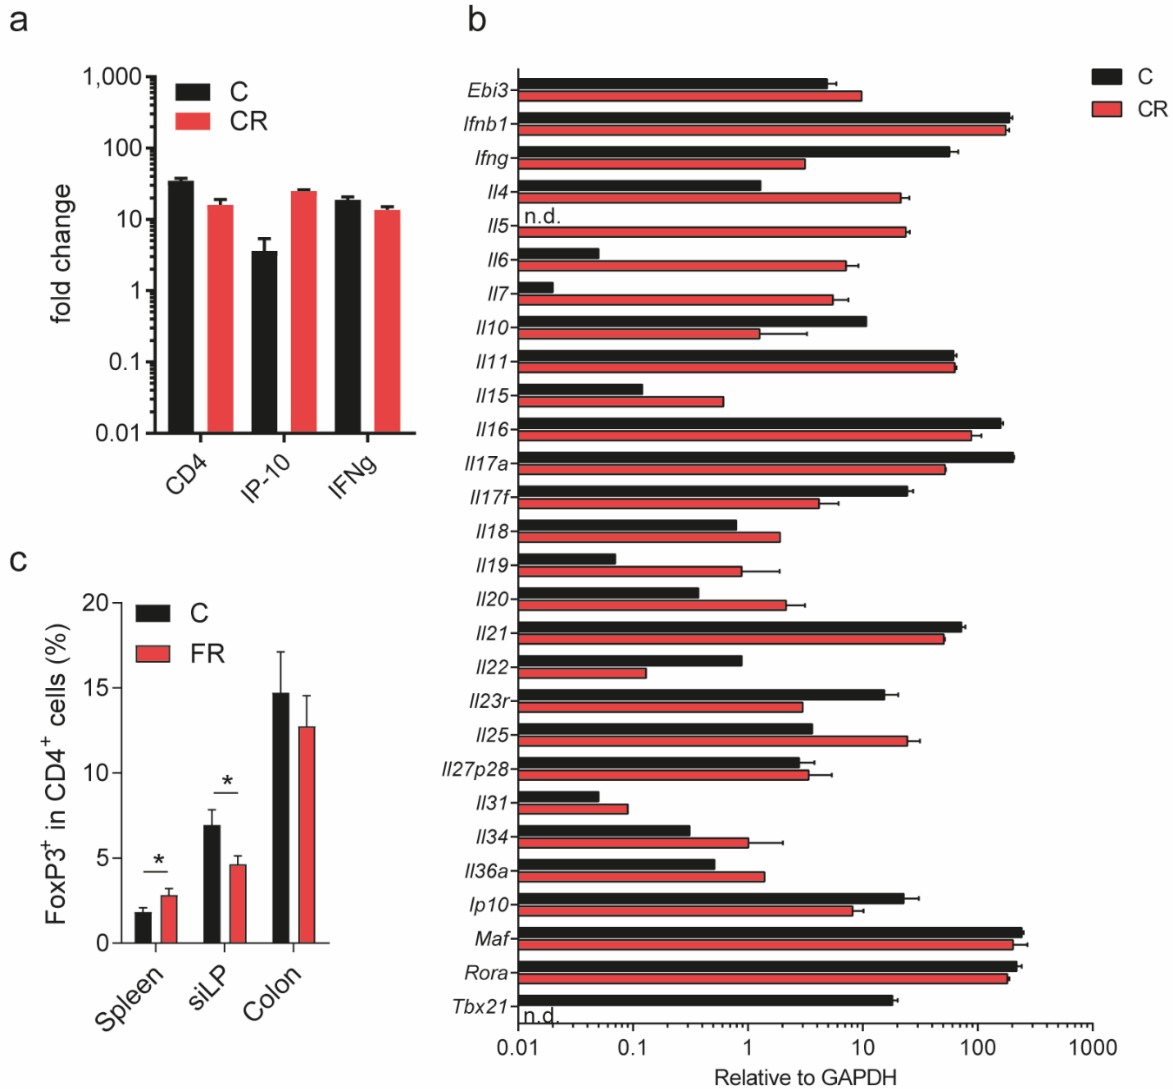

**Supplementary Figure 1 Immune signature in T cells from mice fed a control or cellulose rich diet.** (a) Analysis of gene expression in the spinal cord of OSE mice fed control (C) or cellulose-rich diet (CR). Expression levels of CD4, IP-10, and IFN $\gamma$  genes were quantified by real-time PCR. Fold changes were calculated relative to healthy mice spinal cords.  $n = 2-4$  mice per group. (b) Gene expression profile of CD4 $^+$  T cells. CD4 $^+$  T cells were isolated from small intestinal lamina propria and expression levels of various cytokines and transcription factors were quantified by real-time PCR. n.d. = not detectable. Data were pooled from 3 independent experiments. (c) Frequencies of FoxP3 $^+$  T $_{reg}$  cells from the indicated organs of mice fed control (C) or cellulose-rich diet (CR) are displayed. siLP, small intestinal lamina propria.  $n = 11-12$  mice per group. Data were pooled from 3 independent experiments. \* $P < 0.05$  (Mann-Whitney U test).

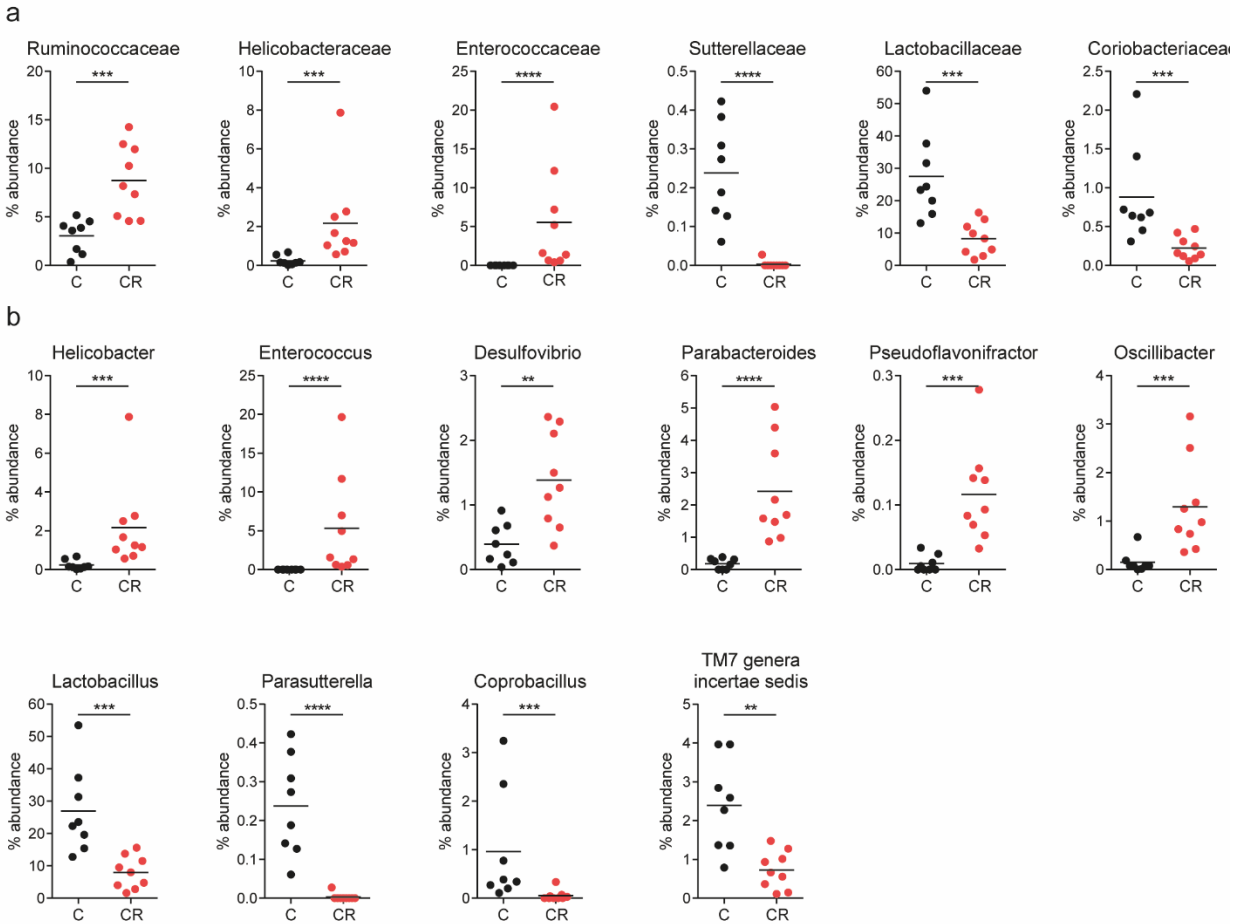

**Supplementary Figure 2 Dietary cellulose alters the composition of the intestinal microbiota.** (a) Relative abundances of bacterial families Ruminococcaceae, Helicobacteraceae, Enterococcaceae, Sutterellaceae, Lactobacillaceae and Coriobacteriaceae in the feces of control (C;  $n = 8$ ) or CR diet-fed mice (CR;  $n = 9$ ). \*\*\* $P < 0.001$ ; \*\*\*\* $P < 0.0001$  (Mann-Whitney U test). (b) Relative abundances of the bacterial genera *Helicobacter*, *Enterococcus*, *Desulfovibrio*, *Parabacteroides*, *Pseudoflavonifractor*, *Oscillibacter*, *Lactobacillus*, *Parasutterella*, *Coprobacillus* and *TM7* genera *Incertae Sedis* in the feces of control (C;  $n = 8$ ) or CR diet-fed mice ( $n = 9$ ). \*\* $P < 0.01$ ; \*\*\* $P < 0.001$ ; \*\*\*\* $P < 0.0001$  (Mann-Whitney U test).

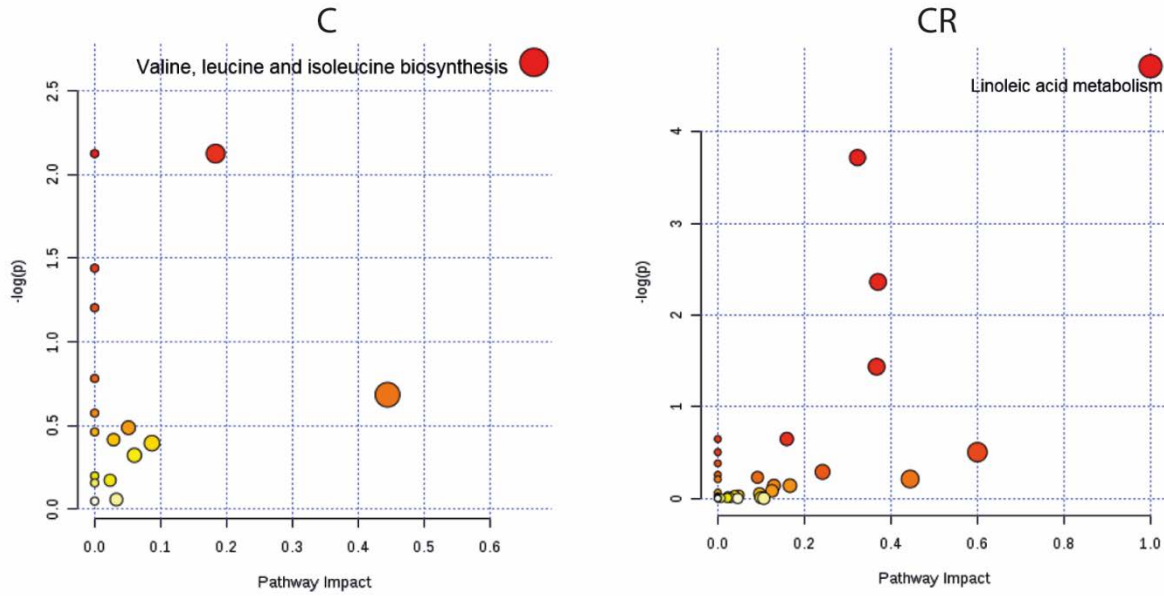

**Supplementary Figure 3 Dietary cellulose alters the cecal metabolites profile. (a)** KEGG pathways enrichment analysis were performed on metabolites of the ceca of mice raised on control (C;  $n = 8$ ) or CR diet ( $n = 10$ ). **(b)** SCFAs, i.e. acetic, propionic and butyric acids, are significantly changed between control (C;  $n = 3$ ) and CR diet-fed mice ( $n = 4$ );  $***P < 0.001$  (Student's t-test).

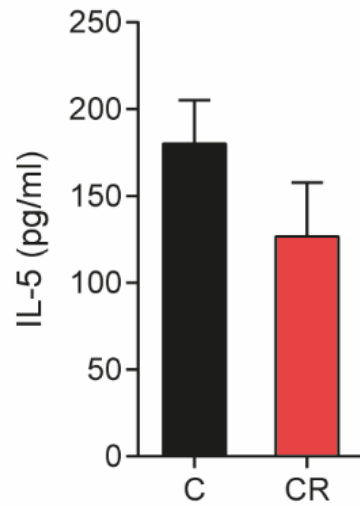

**Supplementary Figure 4 Cecal bacterial lysates does not affect T<sub>H</sub>2 immune response.** Naïve CD4<sup>+</sup> T cells were stimulated under T<sub>H</sub>2 cell polarizing conditions in the presence of cecal lysates (10µg/ml) of control (C lysates) or CR (CR lysates) diet-fed mice. Levels of IL-5 in the supernatants were measured by ELISA. Bars display mean ± s.e.m. *n* = 3 independent experiments.

**Supplementary Table 1. Abundance profiles of bacterial taxa in control (C) and cellulose-rich (CR) diet-fed mice.**

|                                                | Control<br>(mean ± sd) | CR<br>(mean ± sd) | P-value<br>(FDR corrected) |
|------------------------------------------------|------------------------|-------------------|----------------------------|
| <b>Phylum</b>                                  |                        |                   |                            |
| Proteobacteria                                 | 2.68 ± 2.05            | 9.11 ± 4.17       | 0.025                      |
| TM7                                            | 2.39 ± 1.19            | 0.73 ± 0.48       | 0.028                      |
| <b>Family</b>                                  |                        |                   |                            |
| Ruminococcaceae                                | 3.06 ± 1.75            | 8.76 ± 3.67       | 0.014                      |
| Lactobacillaceae                               | 27.51 ± 13.37          | 8.29 ± 5.19       | 0.014                      |
| Enterococcaceae                                | 0.00 ± 0.00            | 5.52 ± 6.87       | 0.014                      |
| Helicobacteraceae                              | 0.24 ± 0.24            | 2.17 ± 2.27       | 0.014                      |
| Coriobacteriaceae                              | 0.88 ± 0.63            | 0.22 ± 0.15       | 0.027                      |
| Desulfovibrionaceae                            | 0.57 ± 0.37            | 2.15 ± 1.08       | 0.028                      |
| Sutterellaceae                                 | 0.24 ± 0.13            | 0.00 ± 0.01       | 0.014                      |
| <b>Genus</b>                                   |                        |                   |                            |
| <i>Lactobacillus</i>                           | 26.98 ± 13.36          | 7.97 ± 5.00       | 0.014                      |
| <i>Enterococcus</i>                            | 0.00 ± 0.00            | 5.32 ± 6.59       | 0.014                      |
| <i>Parabacteroides</i>                         | 0.18 ± 0.16            | 2.42 ± 1.53       | 0.014                      |
| <i>Helicobacter</i>                            | 0.24 ± 0.24            | 2.17 ± 2.27       | 0.014                      |
| <i>Oscillibacter</i>                           | 0.15 ± 0.22            | 1.29 ± 0.95       | 0.023                      |
| <i>Pseudoflavonifractor</i>                    | 0.01 ± 0.01            | 0.12 ± 0.07       | 0.014                      |
| <i>Coprobacillus</i>                           | 0.96 ± 1.18            | 0.05 ± 0.11       | 0.025                      |
| TM7 genera Incertae Sedis                      | 2.39 ± 1.19            | 0.73 ± 0.48       | 0.028                      |
| <i>Desulfovibrio</i>                           | 0.39 ± 0.31            | 1.38 ± 0.73       | 0.040                      |
| <i>Parasutterella</i>                          | 0.24 ± 0.13            | 0.00 ± 0.01       | 0.014                      |
| <b>OTUs</b>                                    |                        |                   |                            |
| <b>Taxonomic assignment*</b>                   |                        |                   |                            |
| OTU_101<br>Burkholderiaceae, HM124111.1 (100%) | 0.25 ± 0.14            | 0.00 ± 0.00       | 0.020                      |
| OTU_11<br>Lachnospiraceae, JQ084455.1 (99%)    | 0.01 ± 0.02            | 4.08 ± 3.39       | 0.021                      |
| OTU_114<br>Firmicutes, AB702888.1 (100%)       | 0.22 ± 0.12            | 0.00 ± 0.00       | 0.020                      |
| OTU_115<br>Lachnospiraceae, JQ085234.1 (100%)  | 0.22 ± 0.22            | 0.01 ± 0.02       | 0.021                      |
| OTU_117<br>Ruminococcaceae, JQ085043.1 (100%)  | 0.22 ± 0.27            | 0.00 ± 0.00       | 0.041                      |
| OTU_118<br>Clostridium IV, EU457476.1 (100%)   | 0.00 ± 0.00            | 0.17 ± 0.22       | 0.041                      |

|                                                                                                                                                                |             |             |       |
|----------------------------------------------------------------------------------------------------------------------------------------------------------------|-------------|-------------|-------|
| OTU_12<br><i>Helicobacter</i> sp., DQ019255.1 (100%)<br><i>Helicobacter apodemus</i> , AY009129.1 (98%)<br><i>Helicobacter canadensis</i> , KJ534296.1 (98%)   | 0.13 ± 0.15 | 1.89 ± 2.11 | 0.021 |
| OTU_12<br>Porphyromonadaceae, FJ674457.1 (95%)                                                                                                                 | 0.18 ± 0.20 | 0.00 ± 0.00 | 0.020 |
| OTU_124<br><i>Clostridium</i> XIVa, EU453012.1 (99%)                                                                                                           | 0.00 ± 0.00 | 0.18 ± 0.12 | 0.021 |
| OTU_13<br>Lachnospiraceae, JQ084127.1 (100%)                                                                                                                   | 0.05 ± 0.08 | 1.85 ± 1.23 | 0.021 |
| OTU_14<br>Lachnospiraceae, HM811058.1 (100%)                                                                                                                   | 4.66 ± 5.14 | 0.01 ± 0.02 | 0.021 |
| OTU_142<br>Coriobacteriaceae, EU456594.1 (100%)<br><i>Denitrobacterium</i> sp., AJ518870.1 (98%)<br><i>Gordonibacter</i> sp., KF785806.1 (98%)                 | 0.13 ± 0.27 | 0.00 ± 0.00 | 0.041 |
| OTU_144<br>Clostridiales Incertae Sedis XIII, AB702885.1 (100%)                                                                                                | 0.15 ± 0.16 | 0.00 ± 0.00 | 0.041 |
| OTU_15<br><i>Alistipes</i> , EU656100.1 (100%)                                                                                                                 | 2.07 ± 1.82 | 0.00 ± 0.00 | 0.021 |
| OTU_155<br>Coriobacteriaceae, EU457418.1 (99%)                                                                                                                 | 0.18 ± 0.15 | 0.00 ± 0.00 | 0.021 |
| OTU_158<br>Lachnospiraceae, EU455294.1 (100%)                                                                                                                  | 0.15 ± 0.16 | 0.00 ± 0.00 | 0.041 |
| OTU_165<br>Porphyromonadaceae, FJ674457.1 (95%)                                                                                                                | 0.10 ± 0.08 | 0.00 ± 0.00 | 0.041 |
| OTU_17<br><i>Desulfovibrio</i> sp., AF056090.1 (100%)<br><i>Desulfovibrio fairfieldensis</i> , U42221.1 (99%)                                                  | 0.39 ± 0.31 | 1.38 ± 0.73 | 0.048 |
| OTU_178<br>Lachnospiraceae, EU454918.1 (100%)                                                                                                                  | 0.00 ± 0.00 | 0.09 ± 0.10 | 0.041 |
| OTU_18<br>Parabacteroides, AB702753.1 (100%)                                                                                                                   | 0.12 ± 0.11 | 1.17 ± 0.96 | 0.027 |
| OTU_19<br>TM7 genera Incertae Sedis, FJ879268.1 (100%)                                                                                                         | 2.15 ± 1.10 | 0.66 ± 0.46 | 0.041 |
| OTU_190<br><i>Barnesiella</i> , EF614530.1 (99%)                                                                                                               | 0.15 ± 0.12 | 0.00 ± 0.00 | 0.021 |
| OTU_195<br>Porphyromonadaceae, EU511738.1 (100%)                                                                                                               | 0.09 ± 0.11 | 0.00 ± 0.00 | 0.021 |
| OTU_20<br>Ruminococcaceae, AB702871.1 (100%)                                                                                                                   | 0.11 ± 0.13 | 1.56 ± 1.05 | 0.021 |
| OTU_21<br>Ruminococcaceae, AB702876.1 (100%)                                                                                                                   | 0.11 ± 0.18 | 1.14 ± 0.89 | 0.027 |
| OTU_210<br>Coriobacteriaceae, EF614565.1 (99%)<br><i>Adlercreutzia equolifaciens</i> , NR_121696.1 (97%)<br><i>Assacharobacter celatus</i> , NR_114402.1 (97%) | 0.09 ± 0.18 | 0.00 ± 0.00 | 0.041 |
| OTU_22<br>Lachnospiraceae, HM817816.1 (100%)                                                                                                                   | 0.02 ± 0.04 | 1.70 ± 0.80 | 0.021 |

|                                                                                                                                                                                                                                                                 |             |             |       |
|-----------------------------------------------------------------------------------------------------------------------------------------------------------------------------------------------------------------------------------------------------------------|-------------|-------------|-------|
| OTU_23<br><i>Alistipes</i> , JQ085082.1 (100%)                                                                                                                                                                                                                  | 0.08 ± 0.13 | 1.00 ± 0.45 | 0.021 |
| OTU_25<br><i>Bacteroides stercorisoris</i> , AB574479.1 (100%)<br><i>Bacteroides oleiciplenus</i> , NR_112895.1 (100%)<br><i>Bacteroides intestinalis</i> , NR_041307.1 (98%)                                                                                   | 0.01 ± 0.03 | 0.95 ± 1.72 | 0.034 |
| OTU_258<br>Lachnospiraceae, JQ085228.1 (100%)                                                                                                                                                                                                                   | 0.12 ± 0.17 | 0.00 ± 0.00 | 0.041 |
| OTU_26<br>Lachnospiraceae, HM821951.1 (100%)                                                                                                                                                                                                                    | 0.00 ± 0.00 | 1.19 ± 1.29 | 0.024 |
| OTU_263<br><i>Parvibacter caecicola</i> , NR_117374.1 (100%)<br><i>Enterorhabdus mucosicola</i> , KC206034.1 (98%)                                                                                                                                              | 0.05 ± 0.04 | 0.00 ± 0.00 | 0.041 |
| OTU_264<br>Lachnospiraceae, JQ084976.1 (100%)                                                                                                                                                                                                                   | 0.00 ± 0.01 | 0.15 ± 0.12 | 0.041 |
| OTU_268<br>Lachnospiraceae, AB627655.1 (100%)                                                                                                                                                                                                                   | 0.06 ± 0.07 | 0.00 ± 0.00 | 0.041 |
| OTU_28<br>Uncultured bacterium, JQ084933.1 (100%)<br><i>Coprobacillus cateniformis</i> , GU811876.1 (98%)                                                                                                                                                       | 0.98 ± 1.23 | 0.00 ± 0.00 | 0.020 |
| OTU_280<br><i>Prevotella</i> , JQ084868.1 (100%)<br><i>Prevotella brevis</i> , AB501176.1 (97%)                                                                                                                                                                 | 0.05 ± 0.05 | 0.00 ± 0.00 | 0.020 |
| OTU_294<br>Coriobacteriaceae, DQ015493.1 (100%)<br><i>Gordonibacter</i> sp., KF785806.1 (98%)                                                                                                                                                                   | 0.03 ± 0.04 | 0.00 ± 0.01 | 0.041 |
| OTU_3<br>Lachnospiraceae, AB627586.1 (100%)                                                                                                                                                                                                                     | 0.00 ± 0.00 | 7.53 ± 6.45 | 0.041 |
| OTU_30<br><i>Alistipes</i> , AB702771.1 (100%)                                                                                                                                                                                                                  | 1.85 ± 1.84 | 0.02 ± 0.07 | 0.021 |
| OTU_34<br><i>Desulfovibrio</i> , JQ084347.1 (100%)                                                                                                                                                                                                              | 0.75 ± 1.35 | 0.00 ± 0.00 | 0.020 |
| OTU_37<br><i>Parabacteroides goldstenii</i> , NR_113076.1 (100%)                                                                                                                                                                                                | 0.00 ± 0.01 | 0.61 ± 0.71 | 0.039 |
| OTU_39<br>Lachnospiraceae, EU656088.1 (100%)                                                                                                                                                                                                                    | 0.90 ± 0.62 | 0.00 ± 0.00 | 0.020 |
| OTU_45<br>Lachnospiraceae, EF098480.1 (100%)                                                                                                                                                                                                                    | 0.00 ± 0.00 | 0.58 ± 0.37 | 0.021 |
| OTU_454<br><i>Barnesiella</i> , AB702761.1 (99%)                                                                                                                                                                                                                | 0.02 ± 0.02 | 0.00 ± 0.00 | 0.041 |
| OTU_5<br><i>Enterococcus durans</i> , KJ702539.1 (100%)<br><i>Enterococcus faecium</i> , KJ702553.1 (100%)<br><i>Enterococcus mundtii</i> , KJ607189.1 (100%)<br><i>Enterococcus avium</i> , AB932546.1 (100%)<br><i>Enterococcus hirae</i> , KJ081452.1 (100%) | 0.00 ± 0.00 | 5.47 ± 6.77 | 0.021 |
| OTU_51<br>Ruminococcaceae, HM835697.1 (100%)                                                                                                                                                                                                                    | 0.01 ± 0.03 | 0.49 ± 0.46 | 0.021 |
| OTU_523<br>Lachnospiraceae, HM817817.1 (99%)                                                                                                                                                                                                                    | 0.12 ± 0.17 | 0.00 ± 0.00 | 0.041 |



|                                                                                                                                                                             |             |             |       |
|-----------------------------------------------------------------------------------------------------------------------------------------------------------------------------|-------------|-------------|-------|
| OTU_56<br>Uncultured bacterium, AB606384.1 (100%)<br><i>Eubacterium infirmum</i> , HM596276.1 (97%)                                                                         | 0.51 ± 0.37 | 0.00 ± 0.00 | 0.020 |
| OTU_560<br>Lachnospiraceae, EU656066.1 (99%)                                                                                                                                | 0.06 ± 0.04 | 0.00 ± 0.00 | 0.021 |
| OTU_6<br><i>Desulfovibrio</i> , AB606308.1 (100%)                                                                                                                           | 0.51 ± 0.54 | 4.41 ± 2.85 | 0.022 |
| OTU_64<br><i>Clostridium</i> XIVa, EU453765.1 (100%)                                                                                                                        | 0.02 ± 0.03 | 0.32 ± 0.17 | 0.032 |
| OTU_66<br>Porphyromonadaceae, HQ740441.1 (100%)                                                                                                                             | 0.44 ± 0.36 | 0.00 ± 0.00 | 0.020 |
| OTU_67<br>Lachnospiraceae, AB702807.1 (100%)                                                                                                                                | 1.20 ± 1.58 | 0.00 ± 0.00 | 0.041 |
| OTU_700<br>Ruminococcaceae, EF097820.1 (100%)                                                                                                                               | 0.02 ± 0.02 | 0.00 ± 0.00 | 0.021 |
| OTU_71<br>Lachnospiraceae, HQ746680.1 (100%)                                                                                                                                | 0.78 ± 0.74 | 0.03 ± 0.08 | 0.025 |
| OTU_719<br>Lachnospiraceae, JQ083958.1 (100%)                                                                                                                               | 0.00 ± 0.01 | 0.05 ± 0.05 | 0.041 |
| OTU_74<br>Lachnospiraceae, AB626912.1 (100%)                                                                                                                                | 0.40 ± 0.52 | 0.00 ± 0.00 | 0.041 |
| OTU_742<br>TM7 genera Incertae Sedis, HQ701044.1 (100%)                                                                                                                     | 0.03 ± 0.02 | 0.00 ± 0.01 | 0.021 |
| OTU_77<br>Lachnospiraceae, HM817078.1 (100%)                                                                                                                                | 0.00 ± 0.01 | 0.31 ± 0.23 | 0.021 |
| OTU_8<br><i>Lactobacillus intestinalis</i> , JF923643.1 (100%)<br><i>Lactobacillus helveticus</i> , KF030750.1 (99%)<br><i>Lactobacillus acidophilus</i> , KF548315.1 (99%) | 3.75 ± 4.67 | 0.00 ± 0.00 | 0.021 |
| OTU_811<br>Erysipelotrichaceae, EU510291.1 (99%)                                                                                                                            | 0.27 ± 0.30 | 0.00 ± 0.00 | 0.041 |
| OTU_84<br>Rikenellaceae, AB702772.1 (100%)                                                                                                                                  | 0.36 ± 0.52 | 0.00 ± 0.01 | 0.041 |
| OTU_86<br>Lachnospiraceae, HM818016.1 (100%)                                                                                                                                | 0.00 ± 0.00 | 0.39 ± 0.35 | 0.021 |
| OTU_88<br>Lachnospiraceae, AB702804.1 (100%)                                                                                                                                | 0.34 ± 0.30 | 0.00 ± 0.00 | 0.020 |
| OTU_894<br>Lachnospiraceae, JQ084418.1 (99%)                                                                                                                                | 1.27 ± 1.85 | 0.01 ± 0.01 | 0.021 |
| OTU_900<br><i>Alistipes</i> , HQ740394.1 (99%)                                                                                                                              | 0.09 ± 0.12 | 0.00 ± 0.00 | 0.021 |
| OTU_903<br><i>Streptococcus gallolyticus</i> , KJ160184.1 (99%)                                                                                                             | 0.02 ± 0.01 | 0.07 ± 0.05 | 0.041 |
| OTU_911<br><i>Streptococcus macedonicus</i> , KF147886.1 (99%)                                                                                                              | 0.01 ± 0.03 | 0.94 ± 0.72 | 0.021 |
| OTU_92<br><i>Streptococcus pasteurianus</i> , JN581989.1 (99%)                                                                                                              | 0.42 ± 0.41 | 0.00 ± 0.00 | 0.032 |
| OTU_95<br><i>Clostridium</i> XIVa, JQ083971.1 (100%)                                                                                                                        | 0.01 ± 0.03 | 0.36 ± 0.33 | 0.021 |

---

|                                    |             |             |       |
|------------------------------------|-------------|-------------|-------|
| OTU_99                             |             |             |       |
| Lachnospiraceae, HM813376.1 (100%) | 0.01 ± 0.01 | 0.23 ± 0.24 | 0.041 |

---

\*Taxonomic assignment of a representative sequence of the OTU at the deepest taxonomic rank possible ( $\geq 80\%$  bootstrap cutoff in RDP Classifier, or  $\geq 98\%$  homology to NCBI classified sequence).
